# Supplementary material
Source: PubMed Central journal article supplement (PMC3282397)
Supplement: hdy201173x3.pdf [file hdy201173x3.pdf]

Figure S1: Difference between  $r^2$  and  $r_s^2$  estimates (top graphic), difference between  $r^2$  and  $r_v^2$  estimates (bottom graphic), for a sample composed of 92 wild and 91 cultivated *Vitis vinifera* accessions as a function of physical distance (in bp) between pairs of loci.

Figure S2: Difference between  $r^2$  and  $r_s^2$  estimated with both wild (WI) and cultivated (CU) accessions plotted as a function of the absolute value of the difference in estimated  $r^2$  between wild and cultivated samples. Black circles indicate couples of loci with a minimum MAF (minor allele frequency) larger than 0.1 within each sample and for both loci, whereas green circles are for those with a minimum MAF lower than 0.1.
