# Supplementary material
Source: PubMed Central journal article supplement (PMC3282397)

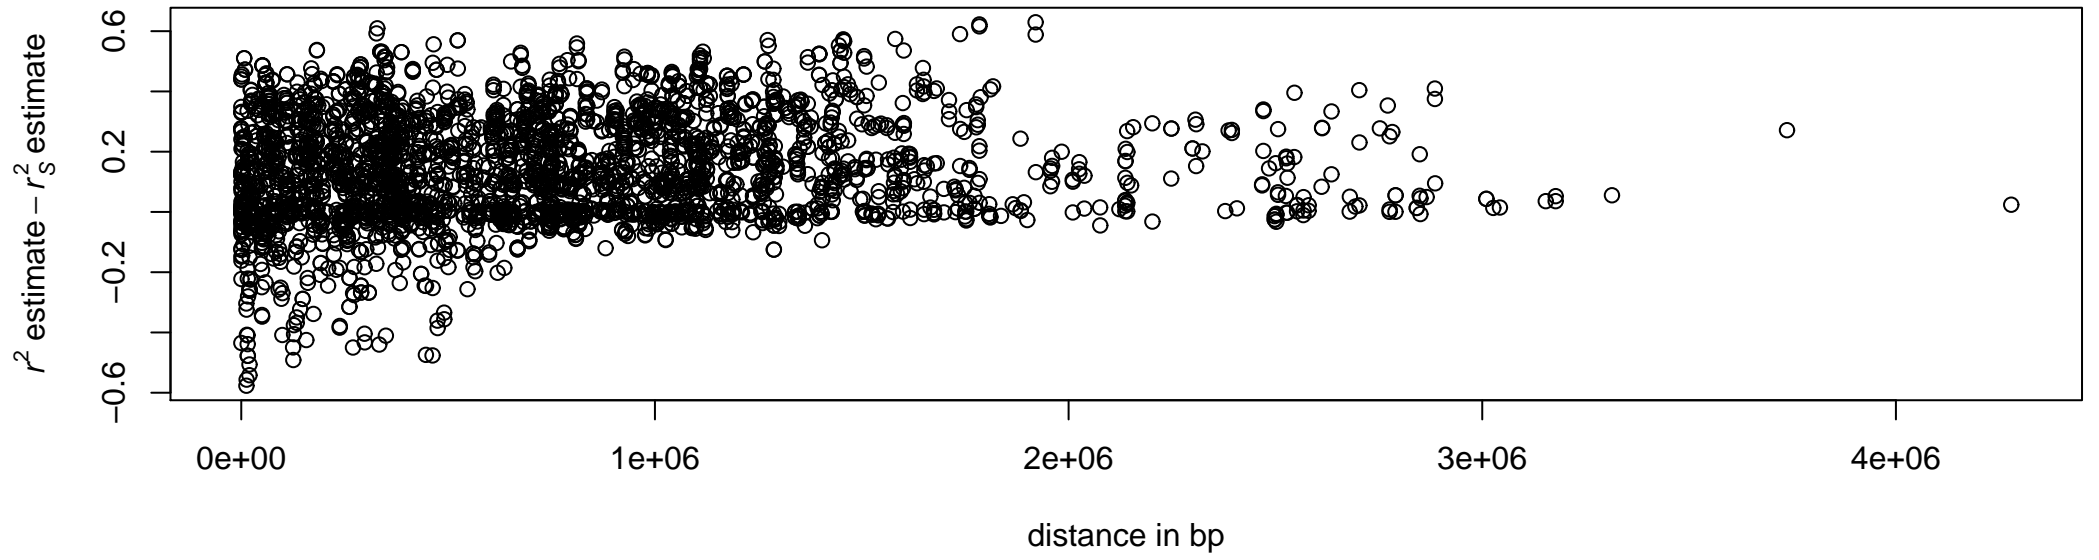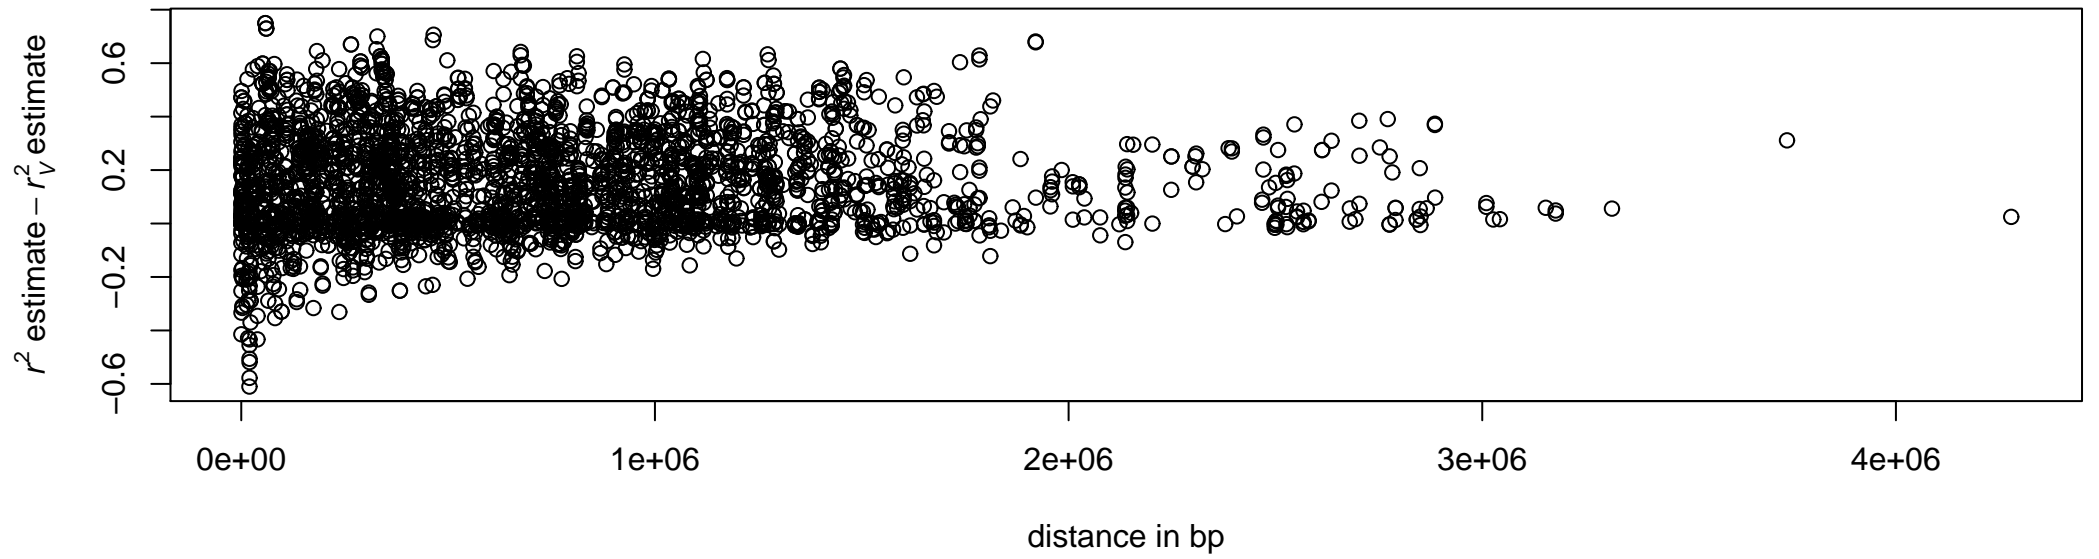

Supplement: hdy201173x1.pdf [file hdy201173x1.pdf]

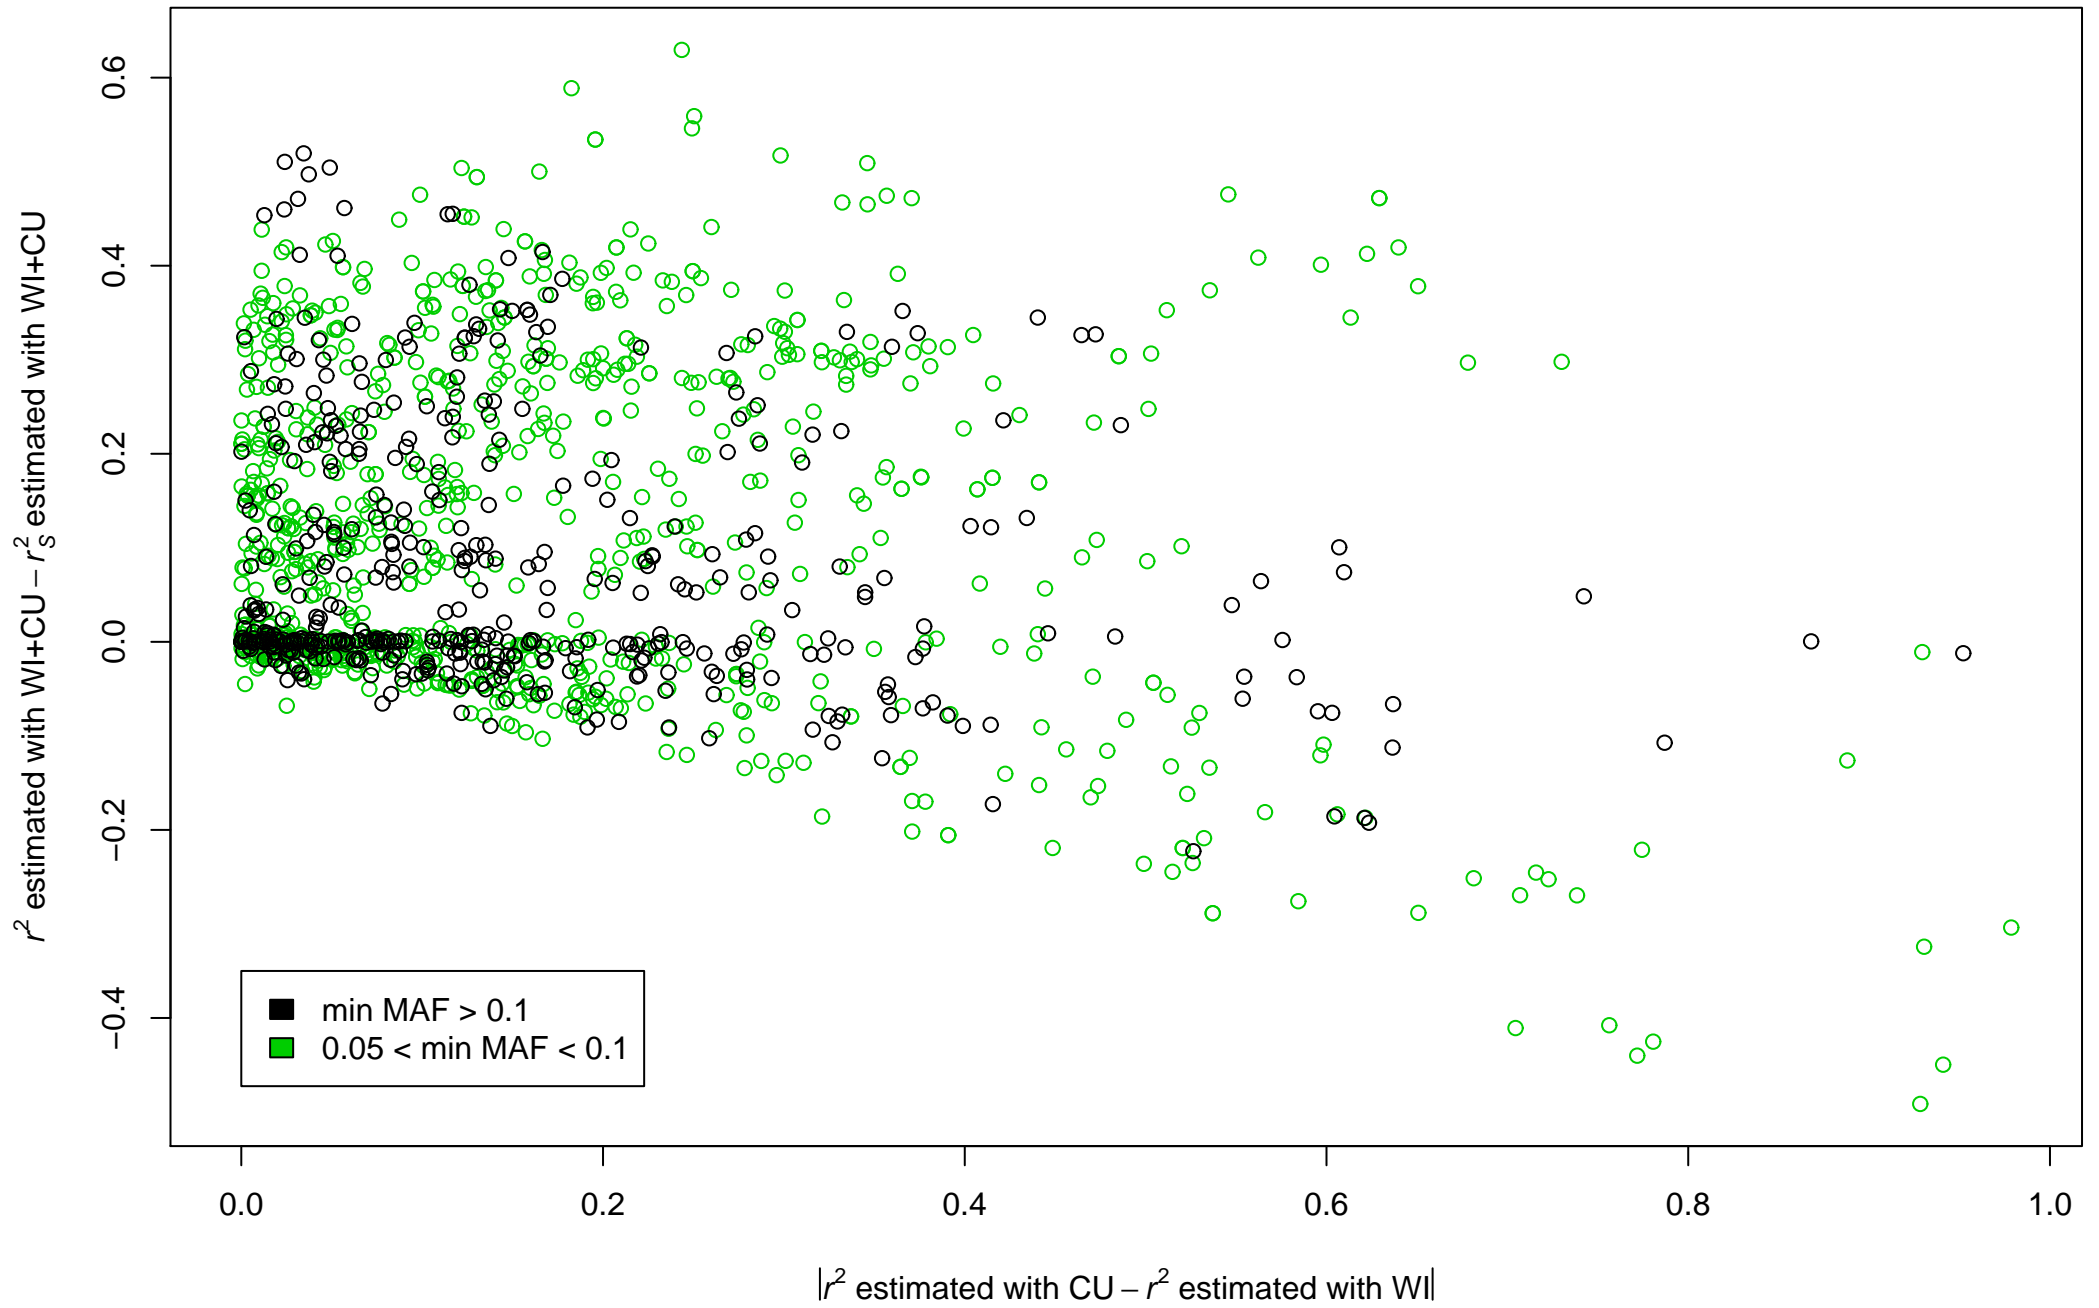

Supplement: hdy201173x2.pdf [file hdy201173x2.pdf]
